# Supplementary material for: Mononuclear copper(i) complexes of triphenylphosphine and N,N′-disubstituted thioureas as potential DNA binding chemotherapeutics
Source: Royal Society of Chemistry journal article supplement (doi:10.1039/d0nj06182d), 2021-01-01
Supplement: d0nj06182d1.pdf [file d0nj06182d1.pdf]

## **Mononuclear Copper (I) Complexes of Triphenylphosphine and *N, N'*-Disubstituted Thioureas as Potential DNA Binding Chemotherapeutics**

Syed Ishtiaq Khan\*<sup>1,3</sup>, Sajjad Ahmad<sup>2</sup>, Inayat Ali Khan<sup>2</sup>, Amin Badshah<sup>1\*</sup>, Muhammad Khawar Rauf<sup>1</sup>, Jahangir Ali Putejo<sup>1</sup>, Muhammad Nasir Siddiq<sup>3</sup>, Ataf Ali Altaf<sup>4</sup> and Samia Kausar<sup>5</sup>

### **Supplemental Data**

**Table S1.** FTIR Vibration of Thiourea Ligands [38] and Complexes (1-9)

| <b>FTIR Vibrations</b>                  | <b>Wavenumbers/cm<sup>-1</sup></b> |
|-----------------------------------------|------------------------------------|
| <b>Ligands</b>                          |                                    |
| $\nu(\text{N-H})_{\text{str}}$          | 3120-3382 cm <sup>-1</sup>         |
| $\nu(\text{C-H})_{\text{aromatic str}}$ | 2950-3100cm <sup>-1</sup>          |
| $\nu(\text{C-S})_{\text{str}}$          | 1150-1190 cm <sup>-1</sup>         |
| $\nu(\text{C-N})_{\text{str}}$          | 1550-1630 cm <sup>-1</sup>         |
| $\nu(\text{C=S})_{\text{str}}$          | 1250-1275 cm <sup>-1</sup>         |
| <b>Complexes</b>                        |                                    |
| $\nu(\text{N-H})_{\text{str}}$          | 3150-3350 cm <sup>-1</sup>         |
| $\nu(\text{C-H})_{\text{aromatic str}}$ | 2910-3050cm <sup>-1</sup>          |
| $\nu(\text{C=O})_{\text{str}}$          | 1660-1685 cm <sup>-1</sup>         |
| $\nu(\text{C=C})_{\text{str}}$          | 1475-1600 cm <sup>-1</sup>         |
| $\nu(\text{C-P})_{\text{str}}$          | 1433-1477 cm <sup>-1</sup>         |
| $\nu(\text{C-F})_{\text{str}}$          | 1320-1327 cm <sup>-1</sup>         |
| $\nu(\text{C-O})_{\text{str}}$          | 1146 cm <sup>-1</sup>              |
| $\nu(\text{C-N})_{\text{str}}$          | 1035-1090 cm <sup>-1</sup>         |
| $\nu(\text{C-Cl})_{\text{str}}$         | 690-695 cm <sup>-1</sup>           |
| $\nu(\text{Cu-S})_{\text{str}}$         | 320-337 cm <sup>-1</sup>           |
| $\nu(\text{Cu-X})_{\text{str}}$         | 263-297 cm <sup>-1</sup>           |
| $\nu(\text{C=S})_{\text{str}}$          | 1220-1270 cm <sup>-1</sup>         |

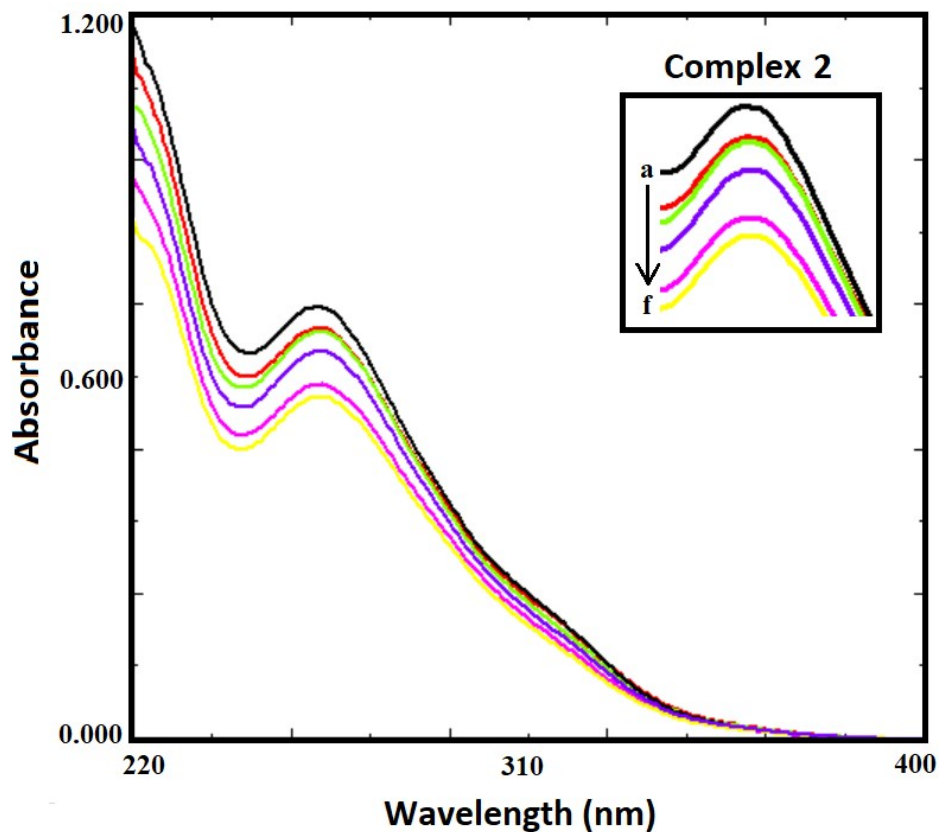

**Figure S1 (a).** UV-Vis Absorption Spectra of Complex 2; in absence of DNA (a) and presence of increasing concentration of DNA (b-f) [10-50 $\mu$ M from b-f respectively]

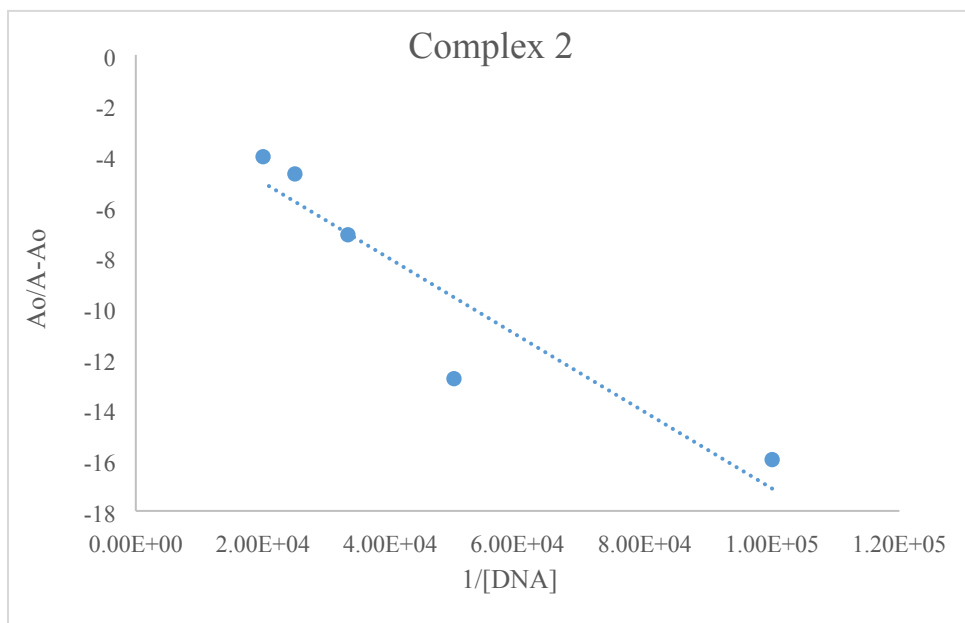

**Figure S1 (b).** Straight line Graph to Determine Binding Constant (K)

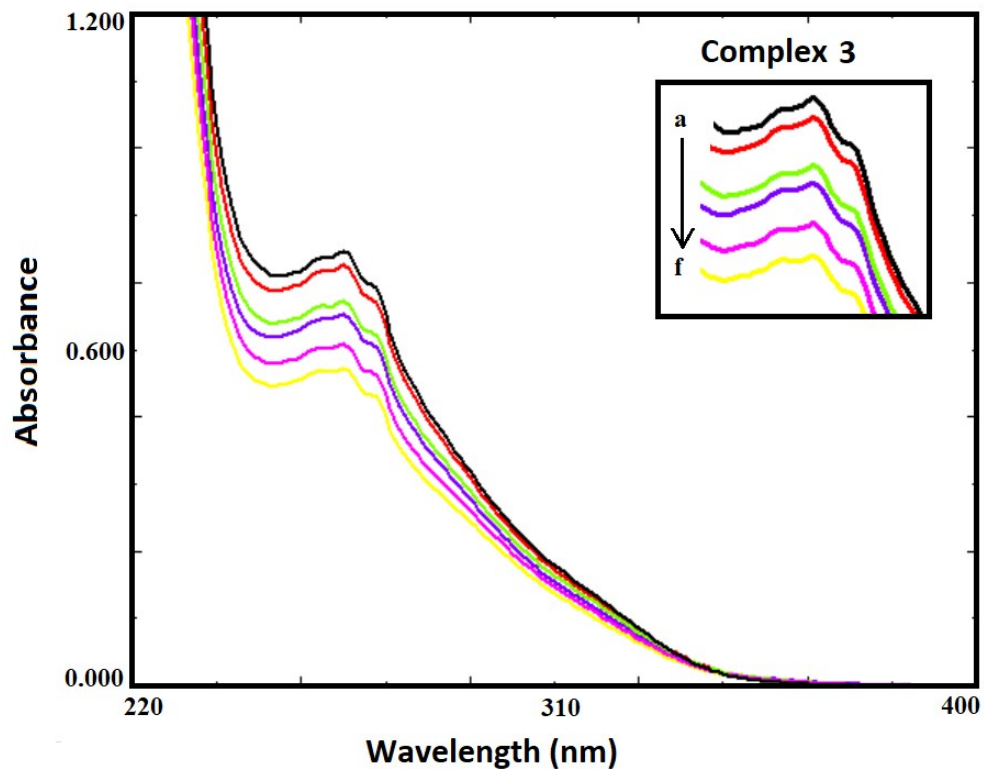

**Figure S2 (a).** UV-Vis Absorption Spectra of Complex 3; in absence of DNA (a) and presence of increasing concentration of DNA (b-f) [10-50 $\mu$ M from b-f respectively]

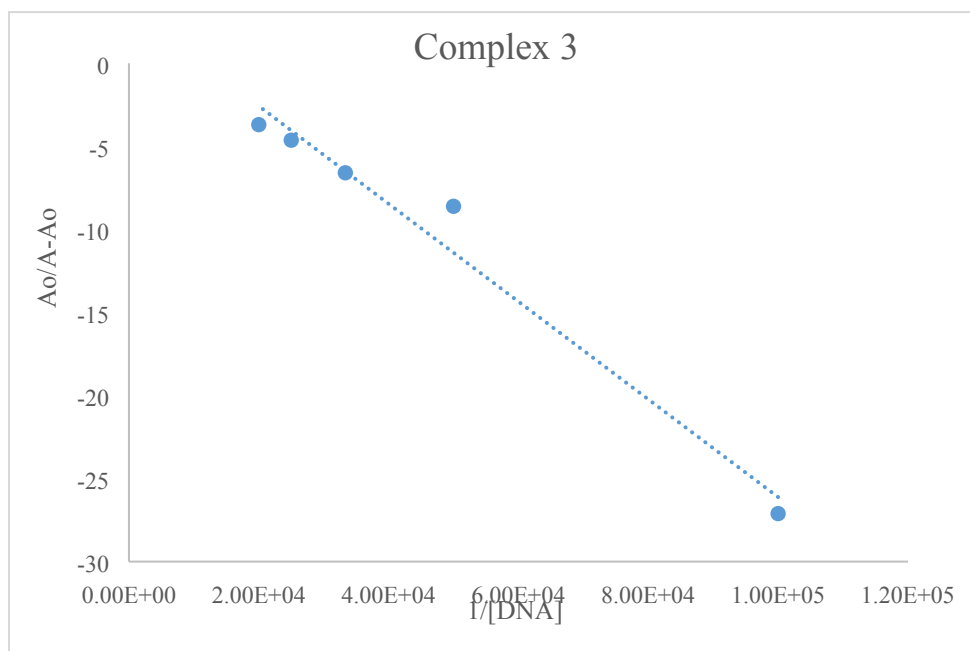

**Figure S2 (b).** Straight line Graph to Determine Binding Constant (K)

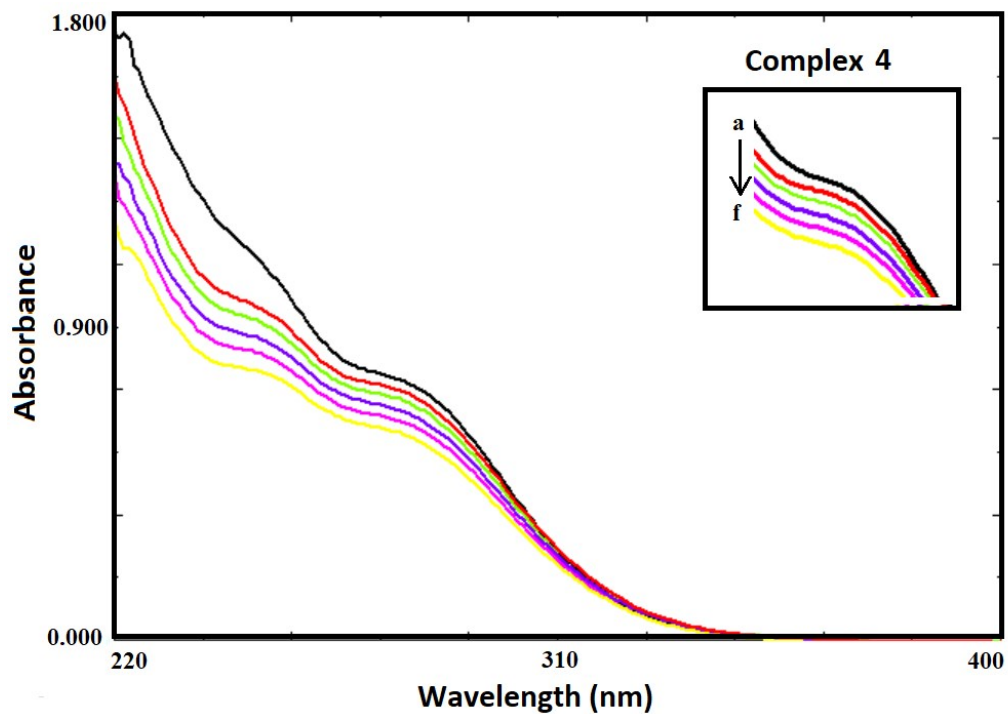

**Figure S3 (a).** UV-Vis Absorption Spectra of Complex 4; in absence of DNA (a) and presence of increasing concentration of DNA (b-f) [10-50 $\mu$ M from b-f respectively]

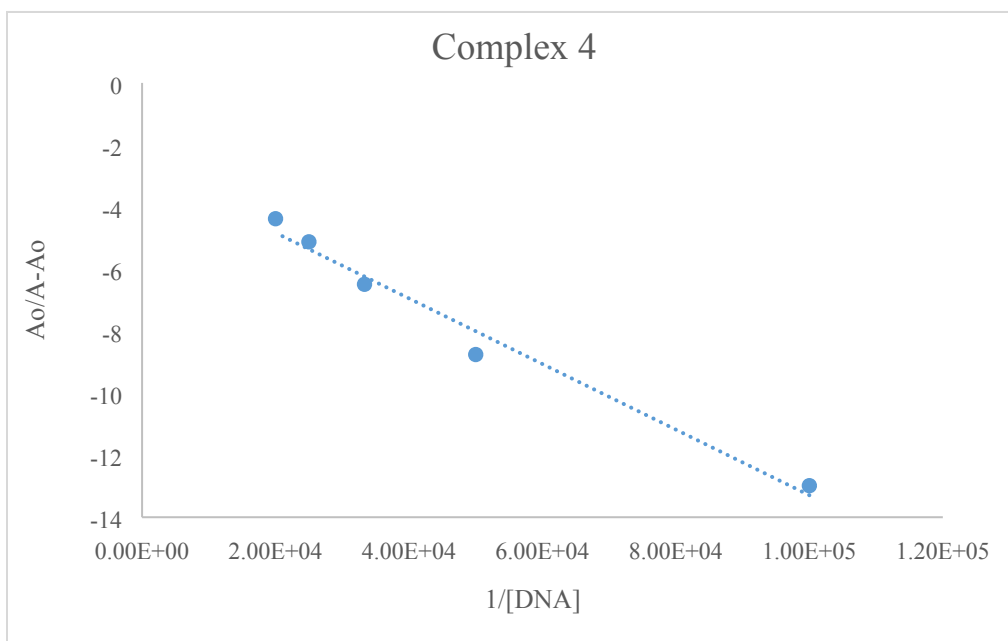

**Figure S3 (b).** Straight line Graph to Determine Binding Constant (K)

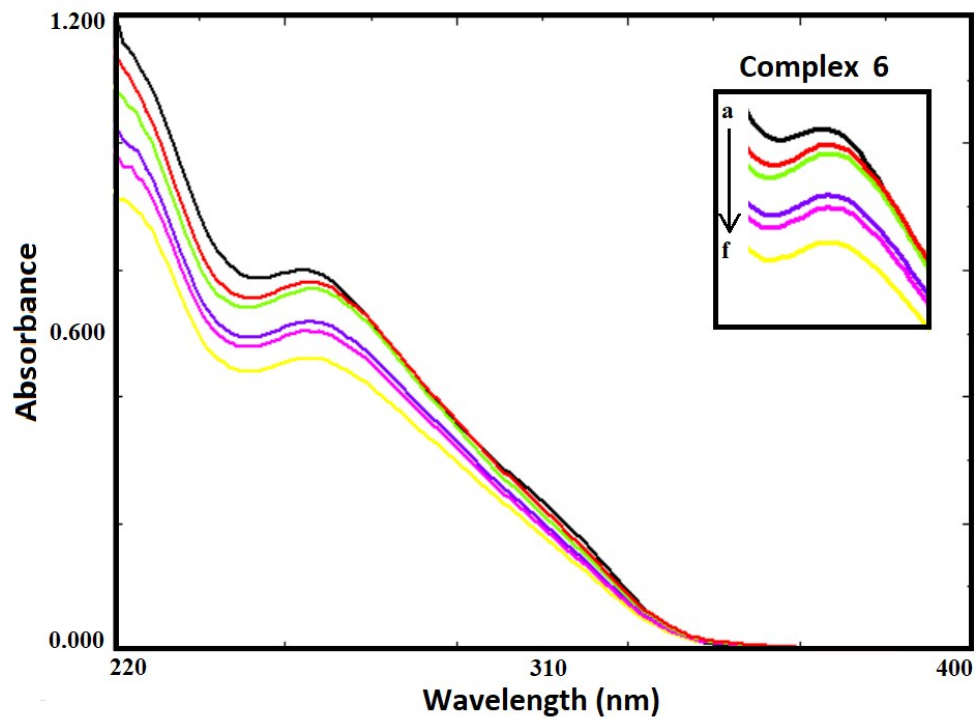

**Figure S4 (a).** UV-Vis Absorption Spectra of Complex 2; in absence of DNA (a) and presence of increasing concentration of DNA (b-f) [10-50 $\mu$ M from b-f respectively]

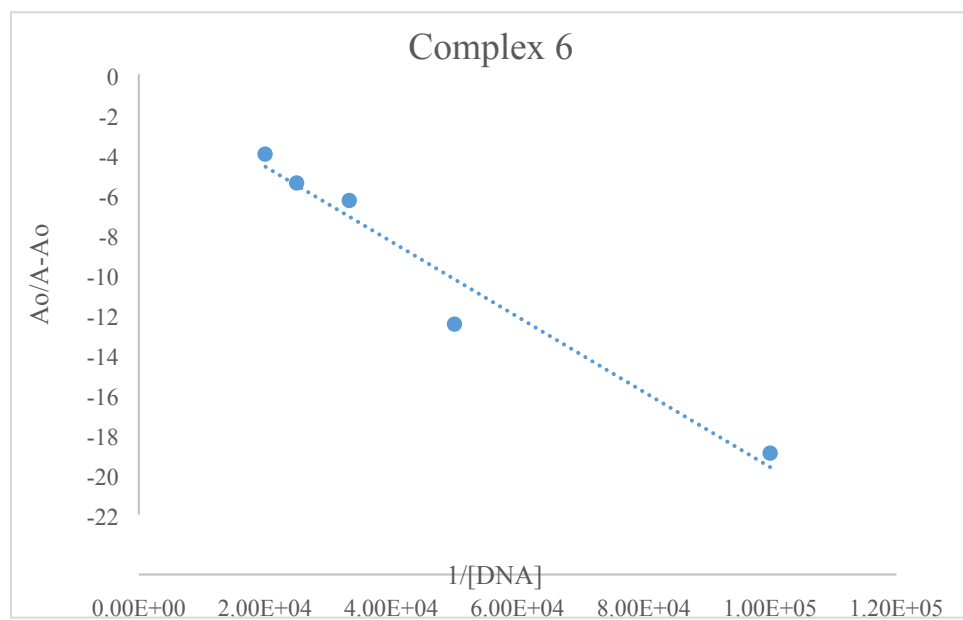

**Figure S4 (b).** Straight line Graph to Determine Binding Constant (K)

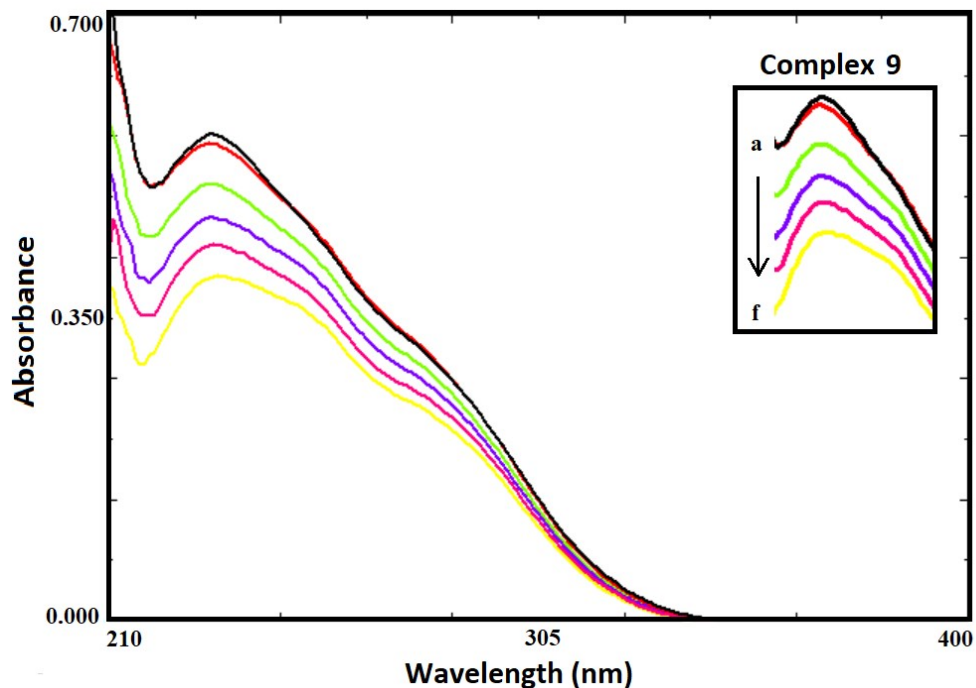

**Figure S5 (a).** UV-Vis Absorption Spectra of Complex 2; in absence of DNA (a) and presence of increasing concentration of DNA (b-f) [10-50 $\mu$ M from b-f respectively]

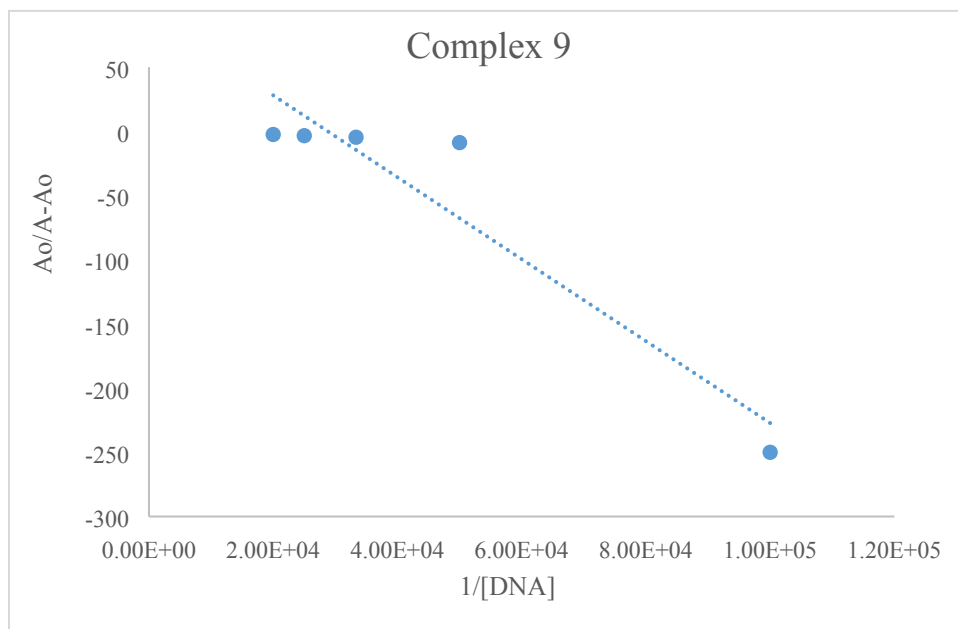

**Figure S5 (b).** Straight line Graph to Determine Binding Constant (K)

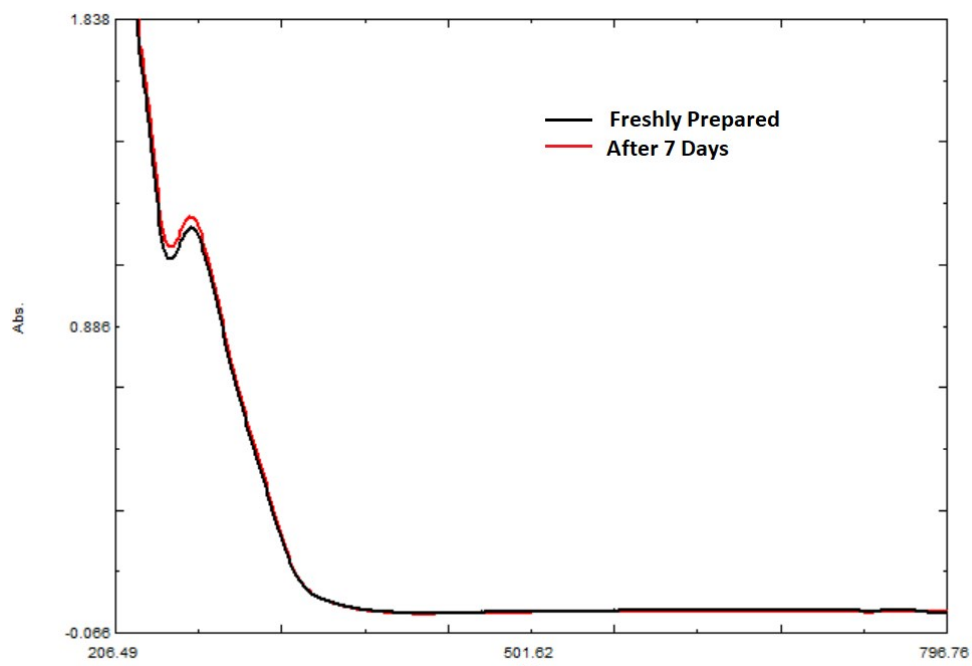

**Figure S6.** UV Spectrum of Complex 1 just after solution preparation and after keeping 7 days
